# Supplementary material
Source: publisher figshare collection journal article supplement (https://sage.figshare.com/ndownloader/files/13438574)
Supplement: Supplementary file 1 [file 13438574]

## Online Appendix

Table A1. Sample Descriptives

Table A1(a). Distribution of Hypomania Scores between Employed and Self-Employed Individuals

|                                                               | Self-Employed |        |        | Employed |        |        | Full Sample |        |        |
|---------------------------------------------------------------|---------------|--------|--------|----------|--------|--------|-------------|--------|--------|
|                                                               | N             | Mean   | S.D.   | N        | Mean   | S.D.   | N           | Mean   | S.D.   |
| Agriculture                                                   | 10            | 0.3120 | 0.1317 | 68       | 0.4210 | 0.2176 | 78          | 0.4071 | 0.2112 |
| Mining                                                        |               |        |        | 13       | 0.3252 | 0.1798 | 13          | 0.3252 | 0.1798 |
| Construction                                                  | 31            | 0.4342 | 0.2339 | 205      | 0.3983 | 0.2522 | 236         | 0.4031 | 0.2497 |
| Manufacturing                                                 | 5             | 0.3818 | 0.3365 | 394      | 0.3900 | 0.2357 | 399         | 0.3899 | 0.2366 |
| Transportation, Communications, and Other<br>Public Utilities | 7             | 0.4286 | 0.3180 | 263      | 0.3709 | 0.2271 | 270         | 0.3724 | 0.2293 |
| Wholesale Trade                                               | 2             | 0.5455 | 0.2571 | 83       | 0.3865 | 0.2403 | 85          | 0.3903 | 0.2403 |
| Retail Trade                                                  | 19            | 0.4565 | 0.2401 | 642      | 0.4050 | 0.2373 | 661         | 0.4065 | 0.2373 |
| Finance, Insurance, and Real Estate                           | 2             | 0.6364 | 0.3857 | 172      | 0.3742 | 0.2129 | 174         | 0.3772 | 0.2155 |
| Business and Repair Service                                   | 14            | 0.3032 | 0.1815 | 116      | 0.3569 | 0.2406 | 130         | 0.3511 | 0.2350 |
| Personal Services                                             | 50            | 0.4200 | 0.2308 | 395      | 0.4147 | 0.2402 | 445         | 0.4153 | 0.2389 |
| Entertainment and Recreation Services                         | 8             | 0.3068 | 0.1369 | 116      | 0.4316 | 0.2655 | 124         | 0.4236 | 0.2606 |
| Professional and Related Services                             | 34            | 0.5070 | 0.2287 | 754      | 0.3749 | 0.2277 | 788         | 0.3806 | 0.2292 |
| Public Administration                                         | --            | --     | --     | 176      | 0.3827 | 0.2234 | 176         | 0.3827 | 0.2234 |
| Armed Services                                                | --            | --     | --     | 12       | 0.4364 | 0.2359 | 12          | 0.4364 | 0.2359 |
| Total                                                         | 182           | 0.4256 | 0.2330 | 3409     | 0.3910 | 0.2346 | 3591        | 0.3927 | 0.2346 |

Table A1(b). Distribution of Education-levels

| Education level                                         | N     | % of the sample |
|---------------------------------------------------------|-------|-----------------|
| 1 No formal schooling                                   | 2     | 0.06            |
| 2 Completed grade K, 1 or 2                             | 3     | 0.08            |
| 3 Completed grade 3 or 4                                | 8     | 0.22            |
| 4 Completed grade 5 or 6                                | 27    | 0.75            |
| 5 Completed grade 7                                     | 18    | 0.5             |
| 6 Completed grade 8                                     | 49    | 1.36            |
| 7 Some high school (grades 9-11)                        | 422   | 11.75           |
| 8 Completed high school                                 | 1,078 | 30.02           |
| 9 Graduate equivalency degree (GED)                     | 970   | 27.01           |
| 10 Some college (no degree)                             | 368   | 10.25           |
| 11 Completed associate or other technical 2-year degree | 368   | 10.25           |
| 12 Completed college (bachelor's degree)                | 113   | 3.15            |
| 13 Some graduate or professional studies                | 165   | 4.59            |
| Total                                                   | 3591  |                 |

Table A2. Variables and Operationalizations

| Variable Name   | Variable in the Data | Variable Description                                                                                                                                                                                                                                                                                                                                                                                                                                                                                                                                                                                                                                                                                                                                                                                                                                                                                                                                                                                                                                                                                                                    | N     | mean   | sd     | min    | max  |
|-----------------|----------------------|-----------------------------------------------------------------------------------------------------------------------------------------------------------------------------------------------------------------------------------------------------------------------------------------------------------------------------------------------------------------------------------------------------------------------------------------------------------------------------------------------------------------------------------------------------------------------------------------------------------------------------------------------------------------------------------------------------------------------------------------------------------------------------------------------------------------------------------------------------------------------------------------------------------------------------------------------------------------------------------------------------------------------------------------------------------------------------------------------------------------------------------------|-------|--------|--------|--------|------|
| Personal Income | S1Q10B               | Total personal income in the past 12 months: 0. \$0 (No; personal), 1. \$1 to \$4,999, 2: \$5,000 to \$7,999, 3. \$8,000 to \$9,999, 4. \$10,000 to \$12,999, 5. \$13,000 to \$14,999, 6. \$15,000 to \$19,999, 7. \$20,000 to \$24,999, 8. \$25,000 to \$29,999, 9. \$30,000 to \$34,999, 10. \$35,000 to \$39,999, 11. \$40,000 to \$49,999, 12. \$50,000 to \$59,999, 13. \$60,000 to \$69,999, 14. \$70,000 to \$79,999, 15. \$80,000 to \$89,999, 16. \$90,000 to \$99,999, 17. \$100,000 or more                                                                                                                                                                                                                                                                                                                                                                                                                                                                                                                                                                                                                                  | 3,591 | 6.4940 | 4.1065 | 0      | 17   |
| Self-Employed   | S1Q9C (derived)      | 1 = Self-employed in own business, professional practice, or farm; 0 = If employed by a private for-profit company, business, or individual; a private not-for-profit, tax-exempt, or charitable organization; the federal government (excluding armed forces), state government, local government; armed forces; or unpaid in a family business or farm. All others coded as missing.                                                                                                                                                                                                                                                                                                                                                                                                                                                                                                                                                                                                                                                                                                                                                  | 3,591 | 0.0507 | 0.2194 | 0      | 1    |
| Hypomania Score | Hypomania Score      | Average of 13 scale items (1 = Yes; 0 = No). “Had 1+ Week Period”: S5Q6A1 “Needed much less sleep than usual”; S5Q6A2 “Found self more talkative than usual”; S5Q6A3 “Talked so fast people had trouble understanding/getting in word edgewise”; S5Q6A4 “Had trouble concentrating because little things got you easily off track”; S5Q6A5 “Thoughts raced so fast that you couldn't keep track of them”; S5Q6A6 “Thoughts raced so fast that it was hard for you to follow your own thoughts”; S5Q6A7 Felt so restless you fidgeted, paced, or couldn't sit still”; S5Q6A8 “Became more active than usual at work, home, pursuing other interests”; S5Q6A9 “Became more sexually active/had sex with people who normally would not interest you”; S5Q6A10 “Became so physically restless that it made you uncomfortable”; S5Q6A11 “Did unusual things that could get you into trouble—buying things couldnt afford/making foolish money decisions/driving recklessly”; S5Q6A12 “Did things later regretted—spent time with people not normally interested in”; S5Q6A13 “Felt unusually important, had special gifts/powers/abilities.” | 3,591 | 0.3927 | 0.2346 | 0.0909 | 1    |
| Education       | S1Q6A                | 1. No formal schooling; 2. Completed Grade K, 1 or 2; 3. Completed Grade 3 or 4; 4. Completed Grade 5 or 6; 5. Completed Grade 7; 6. Completed Grade 8; 7. Some high school (Grades 9–11); 8. Completed high school; 9. Graduate equivalency degree (GED); 10. Some college (no degree); 11. Completed associate or other technical two-year degree; 12. Completed college (bachelor's degree); 13. Some graduate or professional studies (completed bachelor's degree but not graduate degree); and 14. Completed graduate or professional degree (master's degree or higher).                                                                                                                                                                                                                                                                                                                                                                                                                                                                                                                                                         | 3,591 | 8.9282 | 1.6865 | 1      | 13   |
| Year of Birth   | doby                 | Year of birth                                                                                                                                                                                                                                                                                                                                                                                                                                                                                                                                                                                                                                                                                                                                                                                                                                                                                                                                                                                                                                                                                                                           | 3,591 | 1965   | 12     | 1935   | 1984 |

|                                                                                                                                 |            |                                                                                                            |       |          |         |    |         |
|---------------------------------------------------------------------------------------------------------------------------------|------------|------------------------------------------------------------------------------------------------------------|-------|----------|---------|----|---------|
| Sex                                                                                                                             | sex        | 1 = Male; 2 = Female                                                                                       | 3,591 | 1.5650   | 0.4958  | 1  | 2       |
| Native American<br>Asian                                                                                                        | S1Q1D1     | American Indian or Alaska Native (1 = Yes; 2 = No)                                                         | 3,591 | 1.9549   | 0.2076  | 1  | 2       |
|                                                                                                                                 | S1Q1D2     | Asian (1 = Yes; 2 = No)                                                                                    | 3,591 | 1.9766   | 0.1512  | 1  | 2       |
| Black or African American<br>Hawaiian or Other Pacific Islander<br>White                                                        | S1Q1D3     | Black or African American (1 = Yes; 2 = No)                                                                | 3,591 | 1.7981   | 0.4015  | 1  | 2       |
|                                                                                                                                 | S1Q1D4     | Native Hawaiian or Other Pacific Islander (1 = Yes; 2 = No)                                                | 3,591 | 1.9916   | 0.0910  | 1  | 2       |
| Partner in Household<br>Number of Children in Household<br>Number of People in Household<br>Family Income (12 Months)<br>Height | S1Q1D5     | White (1 = Yes; 2 = No)                                                                                    | 3,591 | 1.2389   | 0.4265  | 1  | 2       |
|                                                                                                                                 | spouse     | Spouse of respondent (husband/wife, domestic partner, boyfriend/girlfriend) in household (1 = Yes; 2 = No) | 3,591 | 1.5589   | 0.4966  | 1  | 2       |
| Weight                                                                                                                          | CHLD0_17   | Number of children below 18 in household                                                                   | 3,591 | 0.9126   | 1.1884  | 0  | 8       |
|                                                                                                                                 | numpers    | Number of persons in household                                                                             | 3,591 | 2.7984   | 1.5333  | 1  | 14      |
| Health Insurance<br>FIPS State Dummies<br>Dysthymia                                                                             | S1Q11A     | Total family income in past 12 months                                                                      | 3,591 | 42775    | 42063   | 24 | 1000000 |
|                                                                                                                                 | S1Q24IN    | Height in inches                                                                                           | 3,591 | 66.9089  | 4.0321  | 48 | 84      |
| Manic Disorder                                                                                                                  | S1Q24LB    | Weight in pounds                                                                                           | 3,591 | 176.6121 | 45.2375 | 78 | 450     |
|                                                                                                                                 | S1Q14C4    | Currently covered by private health insurance (1 = Yes; 2 = No)                                            | 3,591 | 1.3684   | 0.4824  | 1  | 2       |
| Panic Disorder without Agoraphobia                                                                                              | fipstate   | FIPS state code                                                                                            | 3,591 | 27.9811  | 15.8030 | 1  | 56      |
|                                                                                                                                 | dyslife    | Dysthymia—Lifetime (non-hierarchical)                                                                      | 3,591 | 0.1707   | 0.3763  | 0  | 1       |
| Panic Disorder without Agoraphobia                                                                                              | nmandxlife | Manic disorder—Lifetime (non-hierarchical)                                                                 | 3,591 | 0.3267   | 0.4691  | 0  | 1       |
|                                                                                                                                 | panlife    | Panic disorder without agoraphobia—Lifetime (non-hierarchical)                                             | 3,591 | 0.1273   | 0.3333  | 0  | 1       |

|                                               |            |                                                                           |       |        |        |   |   |
|-----------------------------------------------|------------|---------------------------------------------------------------------------|-------|--------|--------|---|---|
| Panic Disorder with Agoraphobia               | apanlife   | Panic disorder with agoraphobia—Lifetime (non-hierarchical)               | 3,591 | 0.0395 | 0.1949 | 0 | 1 |
| Agoraphobia with No History of Panic Disorder | gpanlife   | Agoraphobia with no history of panic disorder—Lifetime (non-hierarchical) | 3,591 | 0.0045 | 0.0666 | 0 | 1 |
| Social Phobia                                 | socpdlife  | Social phobia—Lifetime (non-hierarchical)                                 | 3,591 | 0.1395 | 0.3465 | 0 | 1 |
| Specific Phobia                               | sphoblif   | Specific phobia—Lifetime (non-hierarchical)                               | 3,591 | 0.2155 | 0.4113 | 0 | 1 |
| Generalized Anxiety Disorder                  | genaxlife  | Generalized anxiety disorder—Lifetime (non-hierarchical)                  | 3,591 | 0.1557 | 0.3626 | 0 | 1 |
| Obsessive                                     | OBCOMDX2   | Obsessive-compulsive personality disorder                                 | 3,591 | 0.2456 | 0.4305 | 0 | 1 |
| Paranoid                                      | PARADX2    | Paranoid personality disorder (lifetime diagnosis)                        | 3,591 | 0.2094 | 0.4069 | 0 | 1 |
| Schizoid                                      | SCHIZDX2   | Schizoid personality disorder (lifetime diagnosis)                        | 3,591 | 0.1231 | 0.3286 | 0 | 1 |
| Histrionic                                    | HISTDX2    | Histrionic personality disorder (lifetime diagnosis)                      | 3,591 | 0.0936 | 0.2913 | 0 | 1 |
| Antisocial                                    | ANTISOCDX2 | Antisocial personality disorder (with conduct disorder)                   | 3,591 | 0.1479 | 0.3550 | 0 | 1 |
| Avoidant                                      | AVOIDPDX2  | Avoidant personality disorder (lifetime diagnosis)                        | 3,591 | 0.1008 | 0.3011 | 0 | 1 |
| Dependent                                     | DEPPDDX2   | Dependent personality disorder (lifetime diagnosis)                       | 3,591 | 0.0198 | 0.1392 | 0 | 1 |

**Table A3.** Correlation Table

|                                       | 1        | 2        | 3        | 4        | 5        | 6        | 7        | 8        | 9        | 10       | 11       |
|---------------------------------------|----------|----------|----------|----------|----------|----------|----------|----------|----------|----------|----------|
| 1 Personal Income                     | 1        |          |          |          |          |          |          |          |          |          |          |
| 2 Self-Employed                       | 0.005    | 1        |          |          |          |          |          |          |          |          |          |
| 3 Hypomania Score                     | -0.0856* | 0.0324   | 1        |          |          |          |          |          |          |          |          |
| 4 Education                           | 0.4184*  | 0.0008   | -0.0583* | 1        |          |          |          |          |          |          |          |
| 5 Year of birth                       | -0.2984* | -0.0976* | 0.0099   | -0.1172* | 1        |          |          |          |          |          |          |
| 6 Sex                                 | -0.2255* | -0.0124  | -0.0118  | 0.0096   | -0.0249  | 1        |          |          |          |          |          |
| 7 Native American                     | 0.0536*  | -0.0293  | -0.0155  | 0.0711*  | -0.0309  | 0.0096   | 1        |          |          |          |          |
| 8 Asian                               | -0.0379* | -0.0146  | -0.0012  | -0.0831* | -0.0441* | 0.0091   | -0.0248  | 1        |          |          |          |
| 9 Black or African American           | 0.0735*  | 0.015    | 0.0114   | 0.0720*  | 0.004    | -0.0971* | -0.0458* | -0.0595* | 1        |          |          |
| 10 Hawaiian or Other Pacific Islander | 0.0081   | 0.0212   | 0.0024   | 0.0124   | -0.0393* | 0.0182   | 0.0538*  | 0.0465*  | -0.0385* | 1        |          |
| 11 White                              | -0.0711* | -0.0223  | -0.0166  | -0.0571* | 0.0196   | 0.0780*  | -0.1173* | -0.2330* | -0.8651* | -0.1064* | 1        |
| 12 Partner in Household               | -0.1585* | -0.0351* | 0.0509*  | -0.0751* | 0.1908*  | 0.0181   | -0.0039  | -0.0225  | -0.1408* | 0.0232   | 0.1374*  |
| 13 Number of Children in Household    | -0.0641* | 0.0042   | -0.0322  | -0.1083* | 0.1366*  | 0.1193*  | -0.0295  | 0.0382*  | -0.1030* | -0.0377* | 0.0956*  |
| 14 Number of People in Household      | -0.1369* | -0.0044  | -0.0563* | -0.1400* | 0.2120*  | 0.0444*  | -0.0496* | 0.0109   | -0.0304  | -0.0580* | 0.0375*  |
| 15 Family Income (12 Months)          | 0.5204*  | 0.027    | -0.0807* | 0.3376*  | -0.1464* | -0.0753* | 0.0359*  | -0.0449* | 0.1232*  | -0.0097  | -0.1147* |
| 16 Height                             | 0.1759*  | 0.0014   | -0.0048  | 0.0574*  | 0.0674*  | -0.6759* | -0.0016  | 0.0591*  | 0.026    | 0.0359*  | -0.0440* |
| 17 Weight                             | 0.1162*  | 0.0134   | -0.0014  | -0.0051  | -0.1195* | -0.2980* | -0.0009  | 0.0865*  | -0.0741* | 0.0435*  | 0.0357*  |
| 18 Health Insurance                   | -0.4063* | 0.0814*  | 0.0960*  | -0.2824* | 0.1521*  | 0.0052   | -0.0788* | 0.0113   | -0.0933* | -0.006   | 0.0987*  |
| 19 Dysthymia                          | -0.0343* | -0.0226  | -0.0072  | -0.0087  | 0.0236   | 0.0307   | -0.0103  | 0.0825*  | 0.0036   | 0.0057   | -0.0444* |
| 20 Manic Disorder                     | -0.0823* | 0.0268   | 0.1711*  | -0.0228  | -0.0968* | 0.0771*  | -0.0333* | 0.0359*  | 0.0309   | 0.0254   | -0.0477* |
| Panic Disorder without                |          |          |          |          |          |          |          |          |          |          |          |
| 21 Agoraphobia                        | -0.0912* | 0.0177   | 0.5946*  | -0.0503* | -0.0127  | -0.0057  | -0.026   | 0.0057   | 0.0249   | -0.0013  | -0.031   |
| 22 Panic Disorder with Agoraphobia    | -0.0392* | 0.0146   | 0.1299*  | -0.0169  | -0.0848* | 0.0704*  | -0.0378* | -0.0017  | 0.0526*  | 0.0075   | -0.0415* |
| Agoraphobia with No History of        |          |          |          |          |          |          |          |          |          |          |          |
| 23 Panic Disorder                     | -0.0533* | 0.0117   | 0.1666*  | -0.0354* | -0.0323  | 0.0570*  | -0.0041  | 0.003    | -0.0012  | 0.0029   | -0.0165  |
| 24 Social Phobia                      | -0.0223  | 0.0036   | 0.0103   | 0.0053   | -0.0229  | -0.0003  | -0.0056  | 0.0104   | 0.0128   | 0.0061   | -0.0179  |
| 25 Specific Phobia                    | -0.0469* | 0.0352*  | 0.1584*  | -0.021   | -0.0357* | 0.0599*  | -0.0132  | -0.0547* | 0.0223   | 0.0016   | -0.0239  |
| 26 Generalized Anxiety Disorder       | -0.0702* | 0.0302   | 0.1343*  | -0.0078  | -0.0259  | 0.1280*  | 0.0226   | 0.0005   | 0.0106   | 0.0183   | -0.0221  |
| 27 Conduct                            | -0.0221  | 0.0269   | 0.1613*  | 0.0402*  | -0.1207* | 0.0963*  | -0.0066  | 0.0309   | 0.0418*  | -0.0028  | -0.0587* |
| 28 Obsessive                          | 0.0221   | 0.0392*  | 0.1876*  | 0.0711*  | -0.0377* | -0.0096  | -0.01    | -0.0016  | 0.0146   | 0.0168   | -0.0178  |
| 29 Paranoid                           | -0.1341* | 0.0059   | 0.2019*  | -0.1169* | 0.0646*  | 0.0595*  | -0.0266  | -0.02    | -0.0838* | 0.0247   | 0.0792*  |
| 30 Schizoid                           | -0.0626* | -0.0209  | 0.1525*  | -0.0569* | 0.0213   | 0.0073   | -0.0247  | 0.0019   | -0.0755* | 0.0251   | 0.0684*  |
| 31 Histrionic                         | -0.0624* | 0.0086   | 0.2157*  | -0.0419* | 0.1050*  | -0.0151  | 0.0099   | 0.0054   | -0.0194  | -0.002   | 0.0083   |
| 32 Antisocial                         | -0.0585* | 0.0253   | 0.1688*  | -0.1065* | 0.1012*  | -0.1488* | -0.0380* | 0.0229   | 0.0454*  | -0.0221  | -0.0384* |
| 33 Avoidant                           | -0.1110* | -0.0057  | 0.2110*  | -0.0768* | 0.0174   | 0.0531*  | -0.003   | -0.0155  | 0.0278   | 0.0104   | -0.0293  |
| 34 Dependent                          | -0.1140* | -0.0237  | 0.1514*  | -0.0794* | 0.0493*  | 0.0278   | -0.0077  | -0.031   | 0.0216   | -0.0089  | -0.028   |

Note. \* $p < 0.05$  (two-tailed); case-wise deletion

|                                    | 12       | 13       | 14       | 15       | 16       | 17       | 18      | 19      | 20      | 21      | 22       |
|------------------------------------|----------|----------|----------|----------|----------|----------|---------|---------|---------|---------|----------|
| 12 Partner in Household            | 1        |          |          |          |          |          |         |         |         |         |          |
| 13 Number of Children in Household | -0.1820* | 1        |          |          |          |          |         |         |         |         |          |
| 14 Number of People in Household   | -0.3060* | 0.8231*  | 1        |          |          |          |         |         |         |         |          |
| 15 Family Income (12 Months)       | -0.2984* | 0.0156   | 0.1066*  | 1        |          |          |         |         |         |         |          |
| 16 Height                          | 0.0139   | -0.1163* | -0.0646* | 0.0649*  | 1        |          |         |         |         |         |          |
| 17 Weight                          | -0.0244  | -0.0272  | -0.0292  | 0.0128   | 0.4451*  | 1        |         |         |         |         |          |
| 18 Health Insurance                | 0.1704*  | 0.0640*  | 0.0681*  | -0.2816* | -0.0213  | -0.0127  | 1       |         |         |         |          |
| 19 Dysthymia                       | -0.0001  | 0.0062   | 0.0011   | -0.0273  | -0.0052  | 0.0146   | 0.0198  | 1       |         |         |          |
| 20 Manic Disorder                  | 0.0259   | -0.0164  | -0.0605* | -0.0689* | -0.0683* | 0.0312   | 0.0862* | 0.0509* | 1       |         |          |
| Panic Disorder without             |          |          |          |          |          |          |         |         |         |         |          |
| 21 Agoraphobia                     | 0.0328*  | -0.0062  | -0.0285  | -0.0506* | -0.0211  | 0.0004   | 0.1032* | 0.0041  | 0.1890* | 1       |          |
| 22 Panic Disorder with Agoraphobia | -0.0125  | 0        | -0.0261  | -0.0350* | -0.0540* | 0.008    | 0.0513* | 0.008   | 0.1132* | 0.1296* | 1        |
| Agoraphobia with No History of     |          |          |          |          |          |          |         |         |         |         |          |
| 23 Panic Disorder                  | -0.0039  | 0.0113   | -0.0022  | -0.0379* | -0.0507* | -0.0125  | 0.0139  | 0.0165  | 0.1738* | 0.1268* | -0.0775* |
| 24 Social Phobia                   | -0.0079  | 0.0225   | 0.0252   | 0.0127   | 0.0046   | 0.0015   | 0.0182  | 0.0191  | 0.0474* | 0.0426* | -0.0255  |
| 25 Specific Phobia                 | -0.0097  | -0.0211  | -0.0309  | -0.0402* | -0.0539* | 0.0211   | 0.0157  | 0.0225  | 0.1997* | 0.1634* | 0.0560*  |
| 26 Generalized Anxiety Disorder    | -0.0103  | 0.0146   | 0.0066   | -0.0361* | -0.1019* | -0.0474* | 0.0475* | -0.0139 | 0.1222* | 0.1230* | 0.0884*  |
| 27 Conduct                         | 0.0086   | -0.0085  | -0.0492* | -0.0226  | -0.0766* | 0.0232   | 0.0224  | 0.0231  | 0.3237* | 0.1694* | 0.1380*  |
| 28 Obsessive                       | -0.0182  | 0.0022   | -0.025   | 0.0095   | -0.0247  | -0.0002  | -0.0053 | -0.0178 | 0.1521* | 0.1737* | 0.0849*  |
| 29 Paranoid                        | 0.0658*  | 0.0367*  | 0.0172   | -0.0936* | -0.0734* | -0.0309  | 0.1177* | 0.0335* | 0.1976* | 0.1961* | 0.1053*  |
| 30 Schizoid                        | 0.0443*  | 0.0226   | 0.0017   | -0.0800* | -0.0111  | 0.0018   | 0.0618* | 0.0483* | 0.1567* | 0.1620* | 0.0299   |
| 31 Histrionic                      | 0.0909*  | -0.0174  | -0.0101  | -0.0443* | 0.0208   | -0.0339* | 0.0381* | -0.012  | 0.0525* | 0.1657* | 0.0552*  |
| 32 Antisocial                      | 0.032    | 0.0201   | 0.0195   | -0.0687* | 0.1112*  | 0.0546*  | 0.1226* | 0.0154  | 0.0987* | 0.1515* | 0.0481*  |
| 33 Avoidant                        | 0.0367*  | -0.0026  | -0.0145  | -0.0818* | -0.0702* | 0.0327*  | 0.0798* | 0.0394* | 0.2316* | 0.2007* | 0.0720*  |
| 34 Dependent                       | 0.0295   | -0.0064  | -0.0074  | -0.0700* | -0.0335* | 0.0077   | 0.0906* | -0.0101 | 0.1429* | 0.1314* | 0.0298   |

Note. \*p < 0.05 (two-tailed); case-wise deletion

|                                   | 23      | 24      | 25      | 26      | 27      | 28      | 29      | 30      | 31      | 32      | 33      |
|-----------------------------------|---------|---------|---------|---------|---------|---------|---------|---------|---------|---------|---------|
| 23 Agoraphobia with No History of |         |         |         |         |         |         |         |         |         |         |         |
| 23 Panic Disorder                 | 1       |         |         |         |         |         |         |         |         |         |         |
| 24 Social Phobia                  | -0.0136 | 1       |         |         |         |         |         |         |         |         |         |
| 25 Specific Phobia                | 0.3142* | 0.0817* | 1       |         |         |         |         |         |         |         |         |
| 26 Generalized Anxiety Disorder   | 0.2377* | 0.0564* | 0.2737* | 1       |         |         |         |         |         |         |         |
| 27 Conduct                        | 0.2164* | 0.0751* | 0.2572* | 0.2270* | 1       |         |         |         |         |         |         |
| 28 Obsessive                      | 0.1498* | 0.0590* | 0.2314* | 0.1383* | 0.1583* | 1       |         |         |         |         |         |
| 29 Paranoid                       | 0.1695* | 0.0478* | 0.2550* | 0.1680* | 0.2057* | 0.3232* | 1       |         |         |         |         |
| 30 Schizoid                       | 0.1632* | 0.0386* | 0.1843* | 0.1087* | 0.1174* | 0.2667* | 0.3301* | 1       |         |         |         |
| 31 Histrionic                     | 0.1114* | -0.0071 | 0.1245* | 0.1153* | 0.0968* | 0.1921* | 0.2788* | 0.1387* | 1       |         |         |
| 32 Antisocial                     | 0.0684* | -0.0043 | 0.0859* | 0.0697* | 0.0743* | 0.1341* | 0.1596* | 0.1376* | 0.1733* | 1       |         |
| 33 Avoidant                       | 0.2311* | 0.0332* | 0.3697* | 0.1552* | 0.2134* | 0.2065* | 0.3096* | 0.2406* | 0.1020* | 0.1081* | 1       |
| 34 Dependent                      | 0.2175* | -0.0095 | 0.1391* | 0.1055* | 0.1487* | 0.1281* | 0.1924* | 0.1234* | 0.1742* | 0.1155* | 0.3112* |

*Note.* \* $p < 0.05$  (two-tailed); case-wise deletion

**Table A4.** Multilevel Model Estimates

| VARIABLES                                                      | OLS                  |                            | Multilevel model            |                            |
|----------------------------------------------------------------|----------------------|----------------------------|-----------------------------|----------------------------|
|                                                                | No controls          |                            | With controls               |                            |
|                                                                | (1)<br>S1Q10B        | (2)<br>S1Q10B              | (3)<br>S1Q10B               | (4)<br>S1Q10B              |
| Self-Employed × Hypomania Score                                | 21.29<br>(16.14)     | -746.3<br>(578.7)          |                             | 1,723**<br>(740.6)         |
| Hypomania Score × Hypomania Score                              | -2.269<br>(5.936)    | -67.67<br>(171.3)          |                             | -170.7<br>(141.5)          |
| Self-Employed × Hypomania Score × Hypomania Score              | -26.51<br>(19.96)    | 1,251*<br>(687.9)          |                             | -1,438*<br>(772.7)         |
| Self-Employed × Education                                      | 0.280<br>(0.282)     |                            |                             | 0.803<br>(0.495)           |
| Hypomania Score × Education                                    | -0.239<br>(0.567)    |                            |                             | -0.153<br>(0.491)          |
| Self-Employed × Hypomania Score × Education                    | -2.335<br>(1.848)    |                            |                             | -4.940**<br>(2.404)        |
| Hypomania Score × Hypomania Score × Education                  | 0.0590<br>(0.668)    |                            |                             | -0.0295<br>(0.516)         |
| Self-Employed × Hypomania Score × Hypomania Score × Education  | 3.060†<br>(2.291)    |                            |                             | 5.521**<br>(2.441)         |
| Self-Employed × Birth year                                     |                      | 0.0169<br>(0.0506)         |                             | 0.191**<br>(0.0766)        |
| Hypomania Score × Birth year                                   |                      | -0.00707<br>(0.0741)       |                             | -0.0747<br>(0.0679)        |
| Self-Employed × Hypomania Score × Birth year                   |                      | 0.380<br>(0.295)           |                             | -0.856**<br>(0.375)        |
| Hypomania Score × Hypomania Score × Birth year                 |                      | 0.0329<br>(0.0871)         |                             | 0.0866<br>(0.0717)         |
| Self-Employed × Hypomania Score × Hypomania Score × Birth year |                      | -0.635*<br>(0.350)         |                             | 0.709*<br>(0.392)          |
| Self-Employed                                                  | -2.824<br>(2.496)    | -33.94<br>(99.13)          | -0.0833<br>(0.335)          | -381.7**<br>(151.2)        |
| Hypomania Score                                                | 2.535<br>(5.060)     | 15.07<br>(145.7)           |                             | 149.0<br>(134.1)           |
| Education                                                      | 1.013***<br>(0.0902) |                            | 0.461***<br>(0.0323)        | 0.525***<br>(0.0972)       |
| Year of Birth                                                  |                      | -<br>0.0802***<br>(0.0123) | -<br>0.0547***<br>(0.00445) | -<br>0.0436***<br>(0.0132) |
| Sex                                                            | 21.29<br>(16.14)     | -746.3<br>(578.7)          | -1.661***<br>(0.136)        | -1.650***<br>(0.136)       |
| Native American                                                |                      |                            | -0.201<br>(0.259)           | -0.209<br>(0.259)          |
| Asian                                                          |                      |                            | -0.722*<br>(0.418)          | -0.781*<br>(0.417)         |
| Black or African American                                      |                      |                            | -0.444                      | -0.451                     |



|                                                               |            |            |
|---------------------------------------------------------------|------------|------------|
|                                                               | (0.328)    | (0.327)    |
| Hawaiian or Other Pacific Islander                            | -0.268     | -0.285     |
|                                                               | (0.564)    | (0.563)    |
| White                                                         | -0.403     | -0.404     |
|                                                               | (0.320)    | (0.319)    |
| Partner in Household                                          | -0.101     | -0.101     |
|                                                               | (0.113)    | (0.113)    |
| Number of Children in Household                               | 0.974***   | 0.976***   |
|                                                               | (0.0746)   | (0.0744)   |
| Number of People in Household                                 | -0.888***  | -0.892***  |
|                                                               | (0.0615)   | (0.0614)   |
| Family Income (12 Months)                                     | 3.63e-     | 3.64e-     |
|                                                               | 05***      | 05***      |
|                                                               | (1.33e-06) | (1.33e-06) |
| Height                                                        | 0.00413    | 0.00595    |
|                                                               | (0.0178)   | (0.0177)   |
| Weight                                                        | 0.00276**  | 0.00274**  |
|                                                               | (0.00123)  | (0.00123)  |
| Health Insurance                                              | -1.721***  | -1.722***  |
|                                                               | (0.111)    | (0.111)    |
| Dysthymia                                                     | -0.382***  | -0.383***  |
|                                                               | (0.145)    | (0.145)    |
| Dysthymia × Self-employed                                     | 1.159*     | 1.038      |
|                                                               | (0.642)    | (0.660)    |
| Manic Disorder Life                                           | -0.352***  | -0.358***  |
|                                                               | (0.113)    | (0.134)    |
| Manic Disorder Life × Self-Employed                           | 0.149      | -0.431     |
|                                                               | (0.497)    | (0.599)    |
| Panic Disorder without Agoraphobia                            | -0.0895    | -0.0893    |
|                                                               | (0.155)    | (0.155)    |
| Panic Disorder without Agoraphobia × Self-Employed            | -1.287*    | -1.328*    |
|                                                               | (0.685)    | (0.715)    |
| Panic Disorder with Agoraphobia                               | -0.342     | -0.344     |
|                                                               | (0.284)    | (0.284)    |
| Panic Disorder with Agoraphobia × Self-Employed               | 1.213      | 1.111      |
|                                                               | (1.274)    | (1.285)    |
| Agoraphobia with No History of Panic Disorder                 | -1.343*    | -1.399*    |
|                                                               | (0.755)    | (0.754)    |
| Agoraphobia with No History of Panic Disorder × Self-Employed | -0.00675   | 0.601      |
|                                                               | (3.145)    | (3.189)    |
| Social Phobia                                                 | 0.0624     | 0.0575     |
|                                                               | (0.167)    | (0.166)    |
| Social Phobia × Self-Employed                                 | -0.551     | -0.412     |
|                                                               | (0.768)    | (0.781)    |
| Specific Phobia                                               | 0.0472     | 0.0437     |
|                                                               | (0.131)    | (0.131)    |
| Specific Phobia × Self-Employed                               | -1.404**   | -1.505**   |
|                                                               | (0.579)    | (0.590)    |
| Generalized Anxiety Disorder Life                             | 0.0278     | 0.0353     |
|                                                               | (0.155)    | (0.155)    |

|                                                   |                     |                     |                     |                                                           |
|---------------------------------------------------|---------------------|---------------------|---------------------|-----------------------------------------------------------|
| Generalized Anxiety Disorder Life × Self-Employed |                     |                     | -0.545<br>(0.638)   | -0.768<br>(0.655)                                         |
| Obsessive Compulsive Disorder                     |                     |                     | 0.100<br>(0.129)    | 0.0916<br>(0.129)                                         |
| Obsessive Compulsive Disorder × Self-Employed     |                     |                     | -0.0666<br>(0.534)  | 0.0197<br>(0.546)                                         |
| Paranoid                                          |                     |                     | -0.190<br>(0.145)   | -0.200<br>(0.145)                                         |
| Paranoid × Self-Employed                          |                     |                     | 0.762<br>(0.656)    | 0.626<br>(0.672)                                          |
| Schizoid                                          |                     |                     | 0.112<br>(0.165)    | 0.115<br>(0.165)                                          |
| Schizoid × Self-Employed                          |                     |                     | 0.926<br>(0.891)    | 1.278<br>(0.916)                                          |
| Histrionic                                        |                     |                     | -0.0265<br>(0.184)  | -0.00902<br>(0.185)                                       |
| Histrionic × Self-Employed                        |                     |                     | 0.735<br>(0.822)    | 0.482<br>(0.855)                                          |
| Antisocial                                        |                     |                     | 0.121<br>(0.149)    | 0.120<br>(0.149)                                          |
| Antisocial × Self-Employed                        |                     |                     | 0.203<br>(0.597)    | 0.490<br>(0.625)                                          |
| Avoidant                                          |                     |                     | -0.218<br>(0.193)   | -0.203<br>(0.193)                                         |
| Avoidant × Self-Employed                          |                     |                     | -0.382<br>(0.969)   | -0.588<br>(0.986)                                         |
| Dependent Personality Disorder                    |                     |                     | -0.771**<br>(0.380) | -0.794**<br>(0.381)                                       |
| Dependent Personality Disorder × Self-Employed    |                     |                     | -0.722<br>(3.377)   | -2.888<br>(3.503)                                         |
| Constant                                          | -2.479**<br>(1.041) | 164.2***<br>(24.26) | 118.1***<br>(9.004) | 95.55***<br>(26.22)                                       |
| State dummies                                     | Included            | Included            | Included            | Included                                                  |
| Sample weight                                     | Included            | Included            | Included            | Included                                                  |
| Observations                                      | 4,252               | 4,252               | 3,591               | 3,591                                                     |
| R-square                                          | 0.192               | 0.106               |                     |                                                           |
| Number of groups                                  |                     |                     | 51                  | 51                                                        |
| Chi-square                                        |                     |                     | 3585                | 3629                                                      |
| p-value                                           |                     |                     | 0                   | 0                                                         |
|                                                   |                     |                     |                     | Model 1<br>vs. Model<br>2:<br>22.02(14);<br>p =<br>0.0783 |
| Change in Chi-square (Change in df)               |                     |                     |                     |                                                           |

Standard errors in parentheses

\*\*\* p<0.01, \*\* p<0.05, \* p<0.1; † p = 0.182

For the multilevel model, the inferences were consistent when including the sample weight

**Figure A**  
**Moderation plots for models 1 and 2 in Table 1**  
**Figure A(1): Squared term of Hypomania**

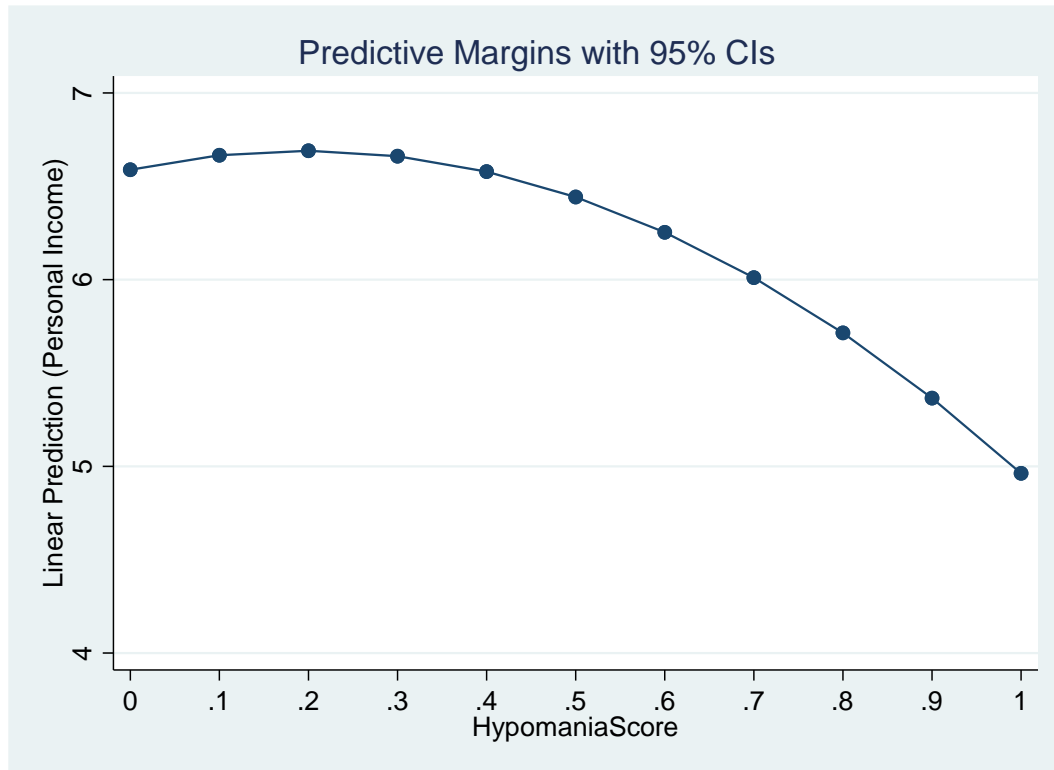

**Figure A(2): Squared Term of Hypomania and Self-Employment**

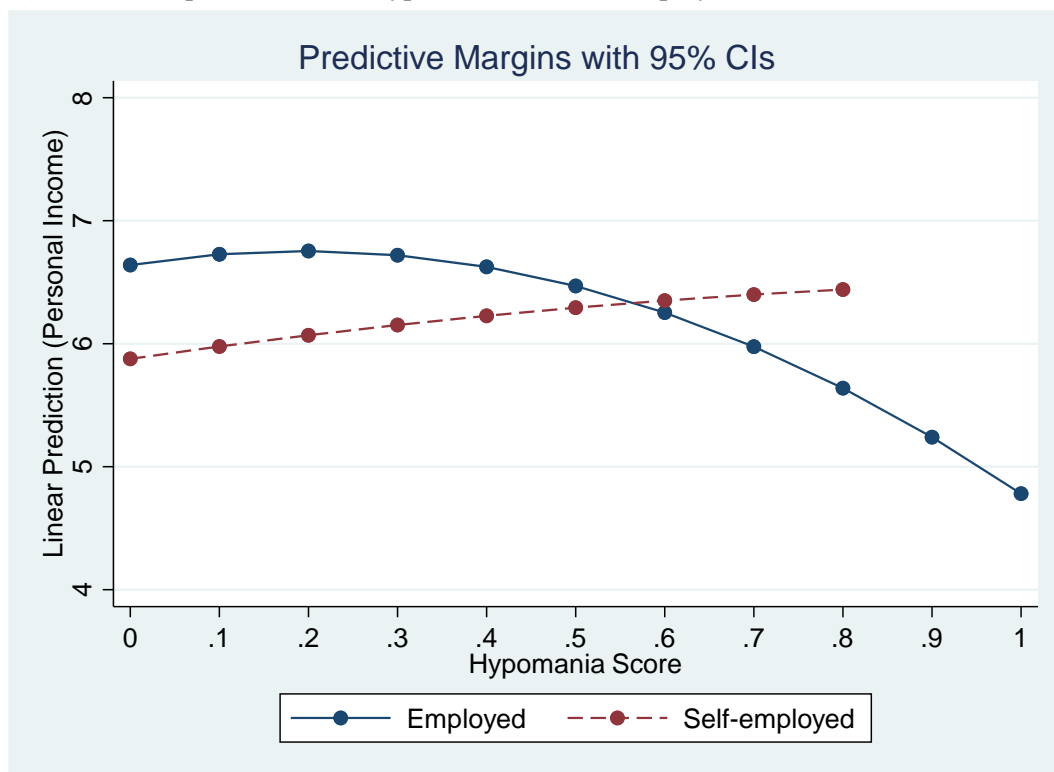

**Figure A(3):** Squared Term of Hypomania, Self-Employment, and Education

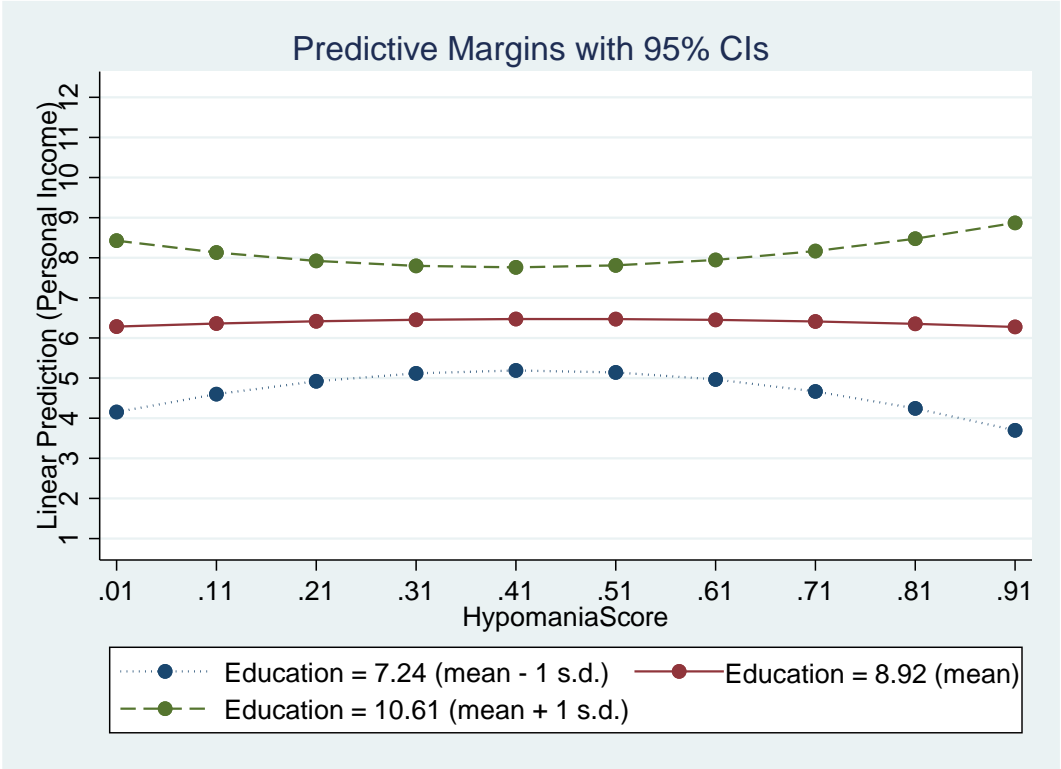

**Figure A(4):** Squared Term of Hypomania, Self-Employment, and Year of Birth
